# Supplementary material for: MOF derived iron oxide-based smart plasmonic Ag/Au hollow and porous nanoshells “ultra-microelectrodes” for ultra-sensitive detection of arsenic
Source: Royal Society of Chemistry journal article supplement (doi:10.1039/c8ta05093g), 2018-01-01
Supplement: c8ta05093g1.pdf [file c8ta05093g1.pdf]

Supporting Information

## **MOF Derived Iron Oxide-based Smart Plasmonic Ag/Au Hollow and Porous Nanoshells “Ultra-Microelectrodes” for Ultra-Sensitive Detection of Arsenic**

Zhenlu Zhao,<sup>\*a</sup> Ziwei Zhang,<sup>a</sup> Chuanping Li,<sup>b</sup> Haoxi Wu,<sup>c</sup> Jianrong Wang<sup>a</sup> and Yizhong Lu<sup>\*a</sup>

<sup>a</sup> School of Material Science and Engineering, University of Jinan, Jinan 250022, Shandong, China.

<sup>b</sup> State Key Lab of Electroanalytical Chemistry, Changchun Institute of Applied Chemistry, Chinese Academy of Sciences, Changchun 130022, Jilin, China.

<sup>c</sup> Institute of Materials, China Academy of Engineering Physics, PO Box 9071-11, Mianyang 621907, Sichuan, China.

E-mail: mse\_zhaozl@ujn.edu.cn.

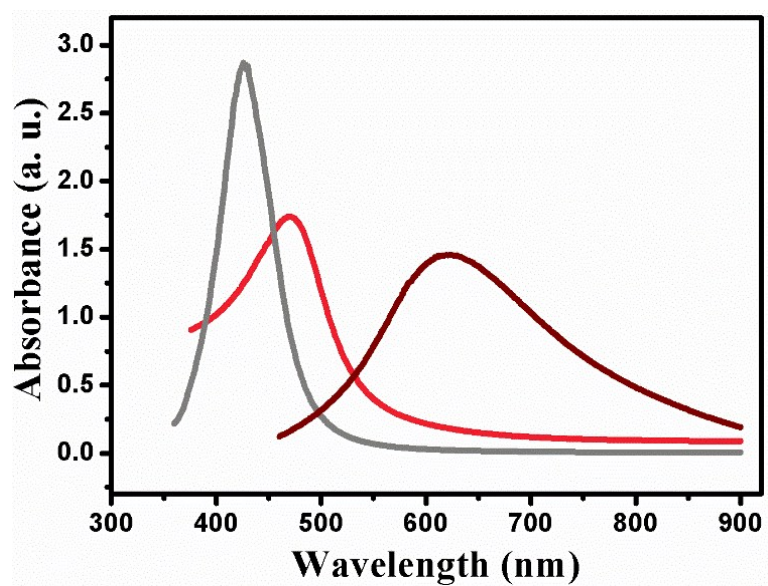

**Fig. S1** UV-vis absorption spectra of the Ag NPs (Gray), Ag/Au ANPs (Pink) and Ag/Au HPNSs (Wine).

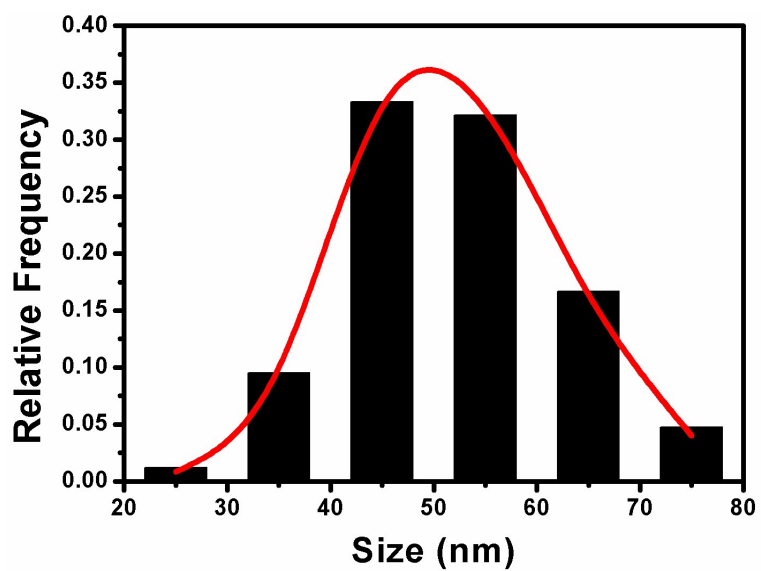

**Fig. S2** Histogram of the particle size distribution of the Ag NPs from Fig. 2a.

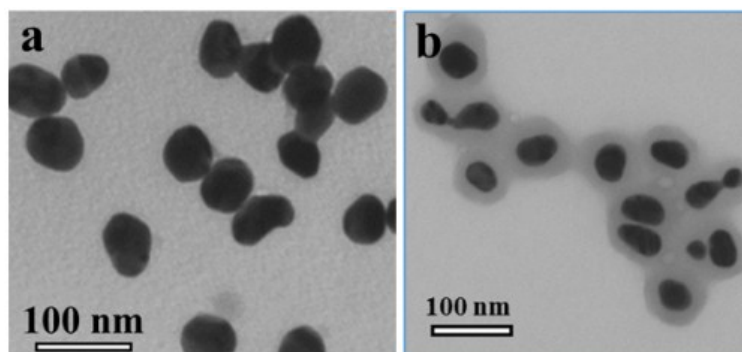

**Fig. S3** Typical TEM images of the Ag/Au ANPs and Ag/Au ANPs@MIF-100(Fe).

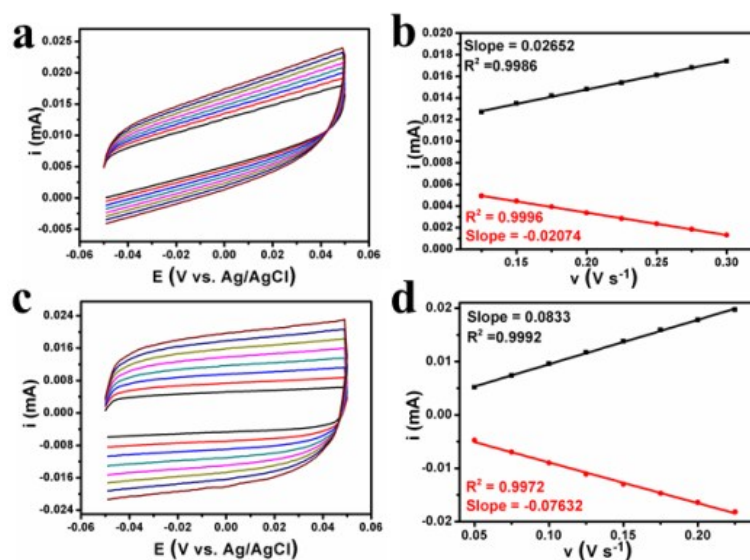

**Fig. S4** Charging currents measured in the non-Faradaic potential range of -0.05 V to 0.05V at different scan rates for the Ag/Au ANPs@FO (a) and Ag/Au HPNSs@FO (c), respectively. The cathodic (red) and anodic (black) charging currents measured at 0 V vs Ag/AgCl, plotted against the scan rates for Ag/Au ANPs@FO (b) and Ag/Au HPNSs@FO (d), respectively. The double-layer capacitance determined from this system is taken by the average of the absolute value of anodic and cathodic slopes of the linear fits.

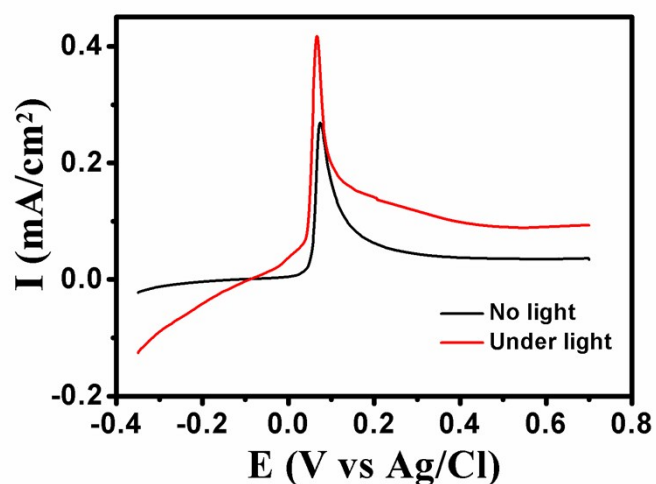

**Fig. S5** Stripping voltammogram response of the Ag/Au HPNSs@FO electrode before and after light irradiation in 1 M HCl containing 2 ppb As(III). The current density was normalized to the electrochemically active surface area (ECSA).

| Electrode                                                             | Electrolyte [pH]                   | Linear range [ppb] | Sensitivity [ $\mu\text{A ppb}^{-1}$ ] | LOD [ppb] | Reference                                    |
|-----------------------------------------------------------------------|------------------------------------|--------------------|----------------------------------------|-----------|----------------------------------------------|
| Au-NEE                                                                | 1 M HCl                            | 0-3                | 3.14                                   | 0.02      | <i>Anal. Chem.</i> 2008, 80, 4836            |
| Au microdisk                                                          | 0.1 M HNO <sub>3</sub>             | 7.5-75             | 0.363                                  | 0.2775    | <i>Anal. Chem.</i> 2004, 76, 5051            |
| Au(111)-like polycrystalline Au                                       | 0.1 M PBS (pH = 1)                 | 0-1125             | 0.364                                  | 0.28      | <i>Anal. Chem.</i> 2010, 82, 9169            |
| Au NPs/GCE                                                            | 1 M HNO <sub>3</sub>               | 0.5-15             | 0.024                                  | 0.25      | <i>Anal. Chem.</i> 2006, 78, 762             |
| Au/Te GCE                                                             | 1 M HCl                            | 0.1-10             | 6.35                                   | 0.0026    | <i>ACS Appl. Mater. Inter.</i> 2013, 5, 5733 |
| AuNPs-CNTs                                                            | 0.1 M HCl                          | 0.75-7.5           | 26.5                                   | 0.1       | <i>Anal. Chim. Acta</i> 2008, 620, 44        |
| CNT/AuNPs-GC/GCE                                                      | 1 M H <sub>2</sub> SO <sub>4</sub> | 7.5-375            | 0.08                                   | 2.5       | <i>Anal. Chem.</i> 2006, 78, 6102            |
| FePt bimetallic                                                       | 10 mM PBS                          | 1-15               | 0.42                                   | 0.8       | <i>Anal. Chem.</i> 2015, 87, 5546            |
| Fe <sub>3</sub> O <sub>4</sub> -RTIL/SPCE                             | 0.1 M acetate buffer (pH = 5.0)    | 1-10               | 4.91                                   | 0.0008    | <i>Anal. Chem.</i> 2013, 85, 2673            |
| C <sub>0.4</sub> Fe <sub>2.6</sub> O <sub>4</sub> nanocubes monolayer | 0.1 M acetate buffer (pH = 5.0)    | 1-20               | 2.12                                   | 0.093     | <i>Anal. Chem.</i> 2018, 90, 1263            |
| Au/Ag HPNSs@FO                                                        | 1 M HCl                            | 0.05-16            | 922.5                                  | 0.05      | This work                                    |

**Table S1** Comparison of electrochemical arsenic performance for the plasmonic Ag/Au HPNSs@FO with other electrocatalysts.
